# Supplementary material
Source: publisher figshare collection journal article supplement (https://gsapubs.figshare.com/ndownloader/files/31132780)
Supplement: Supplementary file 1 [file 31132780]

## Sheet: Table-S1-bulk rock
Table S1. Major and trace elements of Thongmön and Riwu eclogites from central Himalaya.
Sample	Thongmön												Riwu
	DR18-18	DR18-19	DR18-23	DR18-24	DR18-25	DR18-32	DR18-68	DR18-69	DR18-70	DR18-72	DR18-74	DR18-75	RW18-11	RW18-13	RW18-09	RW18-14	RW18-15
Major element (wt. %)
SiO2	44.4346	44.8523	45.6993	45.5614	43.9363	44.74	43.7064	42.5864	42.9902	43.8846	43.0329	46.7626	44.3664	45.3237	46.7477	46.2633	44.529
Al2O3	12.5596	11.2293	11.3893	11.0957	11.6695	14.1625	13.8362	14.3044	13.7882	13.0482	13.1431	12.7724	12.22	14.2676	12.3954	12.2989	11.744
TFe2O3	25.0145	24.8333	24.7509	25.9515	24.716	22.8638	21.1464	21.0746	21.3757	21.4561	21.8845	20.3121	27.677	19.8785	18.813	19.1241	24.6261
CaO	8.92481	9.36238	9.07577	8.07283	9.09235	9.70261	11.5953	11.9115	12.065	11.8516	12.3084	11.4239	6.66898	10.8032	12.0395	12.0176	9.47239
MgO	4.64716	4.64891	4.57159	3.75307	4.69382	5.80198	6.88582	7.15705	7.16088	6.90006	7.11945	6.43849	4.8056	7.1723	6.73886	6.65904	4.78511
K2O	0.715184	1.08604	0.831362	1.87868	1.22388	0.250691	0.423343	0.258467	0.256959	0.281734	0.191176	0.246236	0.224118	0.509128	0.182189	0.313099	1.03002
Na2O	0.798131	0.88683	0.691364	0.023946	0.610648	0.0246123	0.731048	0.949787	0.658338	0.841824	0.616436	0.352508	0.0237752	0.0248315	1.06469	1.28683	0.025656
MnO	0.280393	0.25516	0.278621	0.278828	0.289988	0.238696	0.289959	0.286424	0.288594	0.296167	0.301596	0.268416	0.254268	0.258278	0.263875	0.252836	0.324199
TiO2	2.28594	2.36805	2.37125	2.45206	2.98532	1.86238	1.22859	1.3174	1.2639	1.28342	1.25189	1.26554	2.88738	1.30169	1.47058	1.59594	2.91376
P2O5	0.281067	0.282972	0.267652	0.193919	0.374818	0.235741	0.0982853	0.0970842	0.0935645	0.0901798	0.0917866	0.101342	0.405533	0.112249	0.11089	0.12702	0.235915
LOI	-	0.126556	-	0.664318	0.324056	0.0593883	-	-	-	-	-	-	0.401096	0.293048	0.114568	-	0.243309
Total	99.9414	99.9317	99.9271	99.9264	99.9167	99.9424	99.9414	99.943	99.9413	99.934	99.9412	99.9435	99.9343	99.9446	99.9413	99.9387	99.9296
Na2O+K2O	1.51332	1.97287	1.52273	1.90262	1.83453	0.275303	1.15439	1.20825	0.915298	1.12356	0.807611	0.598744	0.247893	0.53396	1.24688	1.59992	1.05567
Fe	19.1318	18.9932	18.9302	19.8485	18.9035	17.4869	16.1734	16.1185	16.3487	16.4103	16.7379	15.5353	21.1682	15.2037	14.3887	14.6267	18.8348
Mg#	0.195431	0.196637	0.194521	0.159018	0.198913	0.249131	0.298615	0.307493	0.304594	0.296008	0.298417	0.293008	0.185017	0.320536	0.31896	0.312841	0.202588
P2O5/K2O	0.392999	0.260554	0.321943	0.103221	0.306254	0.940367	0.232165	0.375615	0.364122	0.320089	0.480117	0.411564	1.80947	0.220474	0.608652	0.405687	0.22904
Trace element (ppm)
Li	5.23717	34.1616	9.8442	72.5591	32.4628	6.49978	3.61224	2.47284	2.7375	2.32439	3.12211	4.34172	4.79066	3.30615	13.6249	19.8013	6.389
Be	1.39585	1.26161	1.31094	1.77191	2.10768	1.47021	0.864335	0.913239	0.898829	0.915656	0.867756	0.560822	2.96358	0.772361	0.476789	0.802155	1.26422
P	1329.51	1331.57	1250.23	1049	1818.32	1160.52	492.583	554.217	570.101	554.385	526.848	552.134	1981.39	655.49	567.427	581.807	1303.25
Sc	47.5662	45.6447	34.8003	46.4099	43.6442	43.5693	47.0689	50.0681	48.8021	49.336	49.8437	45.8501	46.7143	44.0787	50.0899	49.6998	47.7128
Ti	15772.7	16110.2	15611.8	16327.6	19368.6	12686.7	8049.78	8885.29	8707.13	8700.47	8325	8358.82	19257.8	8692.82	9800	10809.7	19357.6
V	389.269	403.518	387.16	444.894	326.575	307.645	375.189	383.95	391.815	382.201	378.217	312.777	315.288	277.395	371.249	396.051	540.382
Mn	1708.54	1482.2	1717.24	1671.2	1699.22	1424.17	1728.03	1735.64	1745.31	1769.43	1829.56	1613.15	1572.23	1535.95	1563.99	1490.56	1923.57
Co	42.6784	43.9387	47.6045	48.5252	40.2819	58.6311	45.6238	47.0559	48.7546	48.1008	47.3741	49.0015	32.5625	49.3772	45.367	48.9081	43.7334
Ni	31.5099	39.2854	41.1148	37.669	33.7904	94.9743	79.0771	87.2889	89.895	91.7024	91.5211	78.8629	31.9275	97.4924	78.0612	92.4295	51.9826
Ga	20.226	19.2733	20.1661	21.4991	21.4811	19.4255	21.8455	22.0456	21.733	21.7907	20.5169	17.7896	20.3328	17.4667	17.6227	19.5834	21.5272
Rb	15.5924	63.7153	9.49428	141.869	62.6633	3.57472	7.67299	5.15463	4.11898	5.66826	2.7939	5.60288	3.56063	23.3721	3.77427	10.0973	49.2256
Sr	76.5165	98.5575	100.501	71.3976	150.021	121.26	141.391	136.743	132.503	127.873	129.923	121.854	34.1385	119.942	119.37	129.817	80.5132
Y	56.6058	55.6972	48.6488	45.3597	54.3781	33.3106	22.9828	24.3025	23.9472	23.5437	23.9206	22.8456	60.6547	26.5907	26.5367	26.994	53.2411
Zr	200.575	178.148	205.711	191.318	239.737	133.116	96.8493	99.7584	109.458	101.824	96.9436	18.0381	247.549	53.5503	77.2017	97.2789	193.477
Nb	14.8798	15.1108	15.2045	12.9317	23.1996	10.0362	8.50421	9.10473	8.93123	8.49482	8.70682	6.63738	22.9338	7.26983	4.00053	4.40867	11.1056
Mo	0.960488	0.611047	0.425752	0.984692	0.929028	0.214497	0.0713622	0.0531011	0.0920333	0.173774	0.040338	0.00878913	0.795859	0.20551	0.125931	0.124293	0.685813
Sn	6.2485	14.7877	5.68951	3.21672	2.72998	4.3744	1.84115	1.8487	1.81768	1.84594	1.66471	1.20275	14.6745	1.88222	0.89916	1.8074	2.35636
Cs	1.18124	9.24888	1.3354	22.0644	8.7787	0.214759	1.41073	1.18968	0.884489	1.52266	0.940007	3.58141	0.324808	1.2624	0.218192	0.84294	5.66941
Ba	52.9585	136.398	141.359	178.898	269.631	13.6066	41.3429	23.2817	23.9845	24.8524	16.7229	35.8365	4.55656	53.0548	24.7647	71.5375	85.8931
La	25.28	22.5517	21.508	30.5406	36.2448	17.0264	13.2885	14.3625	14.539	13.8937	14.5808	11.7837	33.5288	10.2466	5.00185	5.94658	9.41501
Ce	61.3853	57.4499	54.7346	63.619	76.1266	36.799	28.0911	31.1788	31.5442	30.1952	31.0258	25.9559	71.4208	23.2103	13.5925	15.9529	25.7338
Pr	8.49724	8.15916	7.48793	7.9498	9.57565	4.93854	3.44553	3.87035	3.8906	3.73584	3.76677	3.31453	9.02664	3.09764	2.08425	2.43778	4.12246
Nd	36.6427	35.5731	32.8817	33.4724	39.7308	21.118	14.7049	16.1717	16.173	15.658	15.7108	14.1056	37.9863	13.9826	10.8787	12.4401	21.7534
Sm	9.26385	9.03941	8.20882	7.61412	9.05974	5.05237	3.54671	3.9097	3.90201	3.81801	3.67811	3.54141	8.61348	3.64851	3.50803	3.8472	6.93007
Eu	2.13417	2.32696	1.96394	2.20523	2.41726	1.88995	1.22682	1.30739	1.27214	1.23745	1.22696	1.24351	2.74084	1.2301	1.17129	1.45185	2.27394
Gd	10.242	9.92845	9.13295	8.28692	9.91201	5.72351	4.20452	4.51219	4.40827	4.35268	4.28467	4.2283	9.92428	4.40197	4.5741	4.7911	9.20892
Tb	1.71033	1.66875	1.5718	1.33899	1.60441	0.955216	0.705762	0.745072	0.726561	0.710479	0.72949	0.709972	1.70521	0.757587	0.80278	0.809781	1.61824
Dy	10.9756	10.8311	10.2913	8.44831	10.1539	6.21732	4.51709	4.70225	4.61635	4.57405	4.67478	4.58481	11.3187	5.0697	5.25944	5.31153	10.5761
Ho	2.27283	2.21561	2.13709	1.73373	2.09724	1.29377	0.905412	0.950191	0.958968	0.946144	0.951958	0.936989	2.38274	1.06357	1.08284	1.11174	2.17769
Er	6.57686	6.45313	6.23072	5.02291	6.06971	3.81036	2.63171	2.77022	2.77997	2.73007	2.76506	2.68314	7.04557	3.13496	3.11564	3.21244	6.30646
Tm	0.937883	0.911771	0.893104	0.722682	0.869609	0.545808	0.383447	0.393116	0.395611	0.392017	0.389936	0.380629	1.01946	0.453877	0.431497	0.461041	0.892243
Yb	6.00748	5.86351	5.74255	4.67034	5.65209	3.61205	2.50974	2.55369	2.56644	2.54923	2.53043	2.46225	6.64981	2.96538	2.81275	2.93942	5.74445
Lu	0.90288	0.891477	0.880717	0.712828	0.86165	0.556539	0.385385	0.390059	0.394114	0.391367	0.386476	0.369422	1.00012	0.46028	0.421305	0.443566	0.859081
Hf	5.85427	5.20053	5.72709	5.58708	6.5603	3.79937	2.95678	3.01334	3.29449	3.11145	2.96099	0.701523	6.91138	1.76762	2.4748	3.04904	5.82041
Ta	1.13588	1.07059	1.00443	1.13713	1.56981	0.71814	0.627735	0.636778	0.587521	0.569531	0.612644	0.315033	1.42796	0.504513	0.288536	0.324143	0.704103
Tl	0.0895773	0.28999	0.146686	0.885812	0.30374	0.0244572	0.0626258	0.0375375	0.0339435	0.0436564	0.0221488	0.0545487	0.0252758	0.132296	0.0228571	0.0495708	0.447135
Pb	-	-	-	1.7393	5.31373	-	0.783955	2.06784	0.593553	1.46806	0.77056	0.343153	0.570669	7.97089	1.65396	-	3.01887
Th	6.87361	6.17542	3.67497	8.56116	7.59004	2.23607	4.84794	5.24061	5.45874	5.21024	5.92267	3.79825	6.81108	1.78022	0.685743	0.735118	0.859972
U	1.88261	2.36032	3.04536	3.94487	1.69918	0.571197	0.870291	0.943454	0.967401	0.940361	1.04003	0.594004	1.87627	0.460368	0.241113	0.323593	0.971622
(La/Yb)N	3.01846	2.75881	2.68655	4.69061	4.59978	3.38119	3.79793	4.03423	4.06354	3.90939	4.13319	3.43282	3.61667	2.47856	1.27556	1.45113	1.17564
(Gd/Yb)N	1.41036	1.40075	1.31566	1.46785	1.45074	1.31083	1.38588	1.46169	1.42094	1.41249	1.40075	1.4206	1.2346	1.22802	1.34528	1.34838	1.32616
Eu/Eu*	0.66983	0.750933	0.693435	0.848735	0.779845	1.07447	0.971258	0.951619	0.937732	0.928011	0.944897	0.982431	0.906292	0.938391	0.893933	1.03385	0.870222
ΣREE	182.829	173.864	163.665	176.338	210.375	109.539	80.5466	87.8172	88.1672	85.1842	86.702	76.3002	204.363	73.7231	54.737	61.157	107.612
LOI = Loss on ignition.
(La/Yb)N and (Gd/Yb)N values are normalized to chondrite after Sun & McDonough (1989). Eu/Eu* = EuN/[(SmN)*(GdN)]1/2, Eu anomalies.
Chrondite values from Sun & McDonough (1989)
LA	0.237	0.237	0.237	0.237	0.237	0.237	0.237	0.237	0.237	0.237	0.237	0.237	0.237	0.237	0.237	0.237	0.237
GD	0.2055	0.2055	0.2055	0.2055	0.2055	0.2055	0.2055	0.2055	0.2055	0.2055	0.2055	0.2055	0.2055	0.2055	0.2055	0.2055	0.2055
YB	0.17	0.17	0.17	0.17	0.17	0.17	0.17	0.17	0.17	0.17	0.17	0.17	0.17	0.17	0.17	0.17	0.17
EU	0.058	0.058	0.058	0.058	0.058	0.058	0.058	0.058	0.058	0.058	0.058	0.058	0.058	0.058	0.058	0.058	0.058
SM	0.153	0.153	0.153	0.153	0.153	0.153	0.153	0.153	0.153	0.153	0.153	0.153	0.153	0.153	0.153	0.153	0.153
